# Supplementary material
Source: publisher figshare collection journal article supplement (https://sage.figshare.com/ndownloader/files/13013222)
Supplement: Supplementary file 1 [file 13013222]

**BIOSAFETY KNOWLEDGE SURVEY**

**1 - In which sector do you practice?**

Public

Private

**2 - What is your age?**

20-25

26-30

30-35

>35

**3- What is your gender?**

Female

Male

**4- You are laureates of ...?**

Faculty of Medicine, Pharmacy, Dental, Veterinary ...

Faculties of Biological Sciences, Biotechnology ...

Nurses, laboratory technicians institutes…

Other

**5- How many years of exercise do you accumulate?**

Newly graduated

<1 year

1 to 2 years

2 to 10 years

> 10 years

**6- Did you receive special training in Biosafety in the laboratory?**

Yes

Yes, but insufficient

No

**7- How do you rate your biosafety knowledge?**

Scale : 0, 1,2 3, 4, 5, 6, 7, 8, 9, 10

(0 is poor, 10 is very good)

**8- How much do you believe in the relationship between science and safety?**

Very strong

Moderate

Not a lot

Without relationship

I do not know

**9- Infectious organisms are classified by risk groups. This classification is a function of ...**

Duration of illness that the infectious agent causes

Infectious dose

Clinical signs of infection

The availability of effective treatments

Immunity of the patient

Transmission mode

**10- Biosafety containment levels have objectives**

Establish rules and operational and technical requirements for handling biological risk in the laboratory

Prevent theft and malicious use of pathogens

Describe the minimum containment level and facility design and layout requirements for safe handling of an organism in the laboratory

To protect the pathological products and the bacterial and viral cultures against the contaminations

**11- The "Biohazard" sign posted at the entrance to a laboratory indicates that infectious substances may be present inside the laboratory**

Yes

No

I do not know

**12- What level of biosafety containment should be adopted for handling a viral HIV culture?**

1

2

3

4

I do not know

**13- What level of biosafety containment should be adopted for centrifugation of a biohazardous product suspected of containing a multidrug-resistant strain of *Mycobacterium tuberculosis*:**

1

2

3

4

I do not know

**14- In a biological safety level 2 laboratory, all the manipulations must be performed in a microbiological safety cabinet**

Yes

No

I do not know

**15- There are 3 classes of Biological Safety Cabinets; Class I, Class II and Class III. The choice and use of a PSM is based on ...**

The number of manipulators

The nature of organisms to handle

The manipulations to perform

The airborne character of the agent handled

The nature of the dangers involved

**16- Which of the following manipulations are aerosol generating**

Homogenization

Freeze-drying

Incineration

Centrifugation

Sedimentation

**17- The following is an example of personal protective equipment:**

Biosafety cabinet

Gloves

Decontamination procedures

Microbiological safety station

High Efficiency Filter (HEPA)

FFP2 mask

**18- Personal protective equipment should be completely removed before leaving the laboratory**

Yes

No

I do not know

**19- Human or animal tissues and body fluids are considered infectious only when the result confirms the presence of the pathogen**

Yes

No

I do not know

**20- Gloves must be removed when soiled with biological fluids**

Immediately

At the end of the manipulation

When I leave the laboratory

**21- Bleach is the best solution for cleaning a surface that has been contaminated by biological fluids**

Yes

No

I do not know

**22- For the disinfection of the hands by hydro-alcoholic friction, the necessary action time for a good efficiency is ...**

20 to 30 seconds

30 to 50 seconds

50 to 80 seconds

80 to 120 seconds

I do not know

**23- Biological hazardous waste must be separated from household waste**

Yes

No

I do not know

**24- Waste such as needles and scalpels should always be disposed of as infectious waste in a plastic bag**

Yes

No

I do not know

**25- The following products must benefit from a secure transport complying with WHO standards ...**

Biopsies

Whole blood

Dry blood

Antibiotic solution

Vaccinal viral strain
